# Supplementary material
Source: publisher site journal article supplement (https://jamanetwork.com/crawlprevention/governor?content=%2FErrors%2F404.aspx%3F404%3Bhttps%3A%2F%2Fjamanetwork.com%3A443%2Fcontent%2Fsuppl%2F2006%2F12%2F07%2F296.20.2512.DC1%2Fpdfpat112206.pdf)
Supplement: Supplementary file 1 [file governor]

Validate User


We are sorry, but we are experiencing unusual traffic at this time. Please help us confirm that you are not a robot and we will take you to your content.

Could not validate captcha. Please try again.

Take me to my Content
